# Supplementary material for: StoneMod: a database for kidney stone modulatory proteins with experimental evidence
Source: PubMed Central journal article supplement (PMC7493926; doi:10.1038/s41598-020-71730-3), 2020-09-15
Supplement: 41598_2020_71730_MOESM1_ESM.pdf [file 41598_2020_71730_MOESM1_ESM.pdf]

## SUPPORTING INFORMATION

**StoneMod: A database for kidney stone modulatory proteins with experimental evidence**

Supatcha Sasanarakkit, Paleerath Peerapen, and Visith Thongboonkerd\* (\*correspondence to: vthongbo@yahoo.com)

**Supplementary Table S1:** Details for sources of modulatory proteins, sample size, cells, animals and human subjects in each study included in the StoneMod database.

| Study Title and References                                                                                                                                   | PubMed ID | Sources of kidney stone modulatory proteins |                                                                                            |        |                                                                                                                                                                                       |
|--------------------------------------------------------------------------------------------------------------------------------------------------------------|-----------|---------------------------------------------|--------------------------------------------------------------------------------------------|--------|---------------------------------------------------------------------------------------------------------------------------------------------------------------------------------------|
|                                                                                                                                                              |           | Commercial                                  | <i>In vitro</i>                                                                            | Animal | Human                                                                                                                                                                                 |
| The calcium oxalate crystal growth inhibitor protein produced by mouse kidney cortical cells in culture is osteopontin. <sup>1</sup>                         | 1414495   | -                                           | <b>Cellular secretome:</b><br><i>Primary renal cortical tubular cells from C57b16 mice</i> | -      | -                                                                                                                                                                                     |
| Effects of chondroitin sulphate, human serum albumin and Tamm-Horsfall mucoprotein on calcium oxalate crystallization in undiluted human urine. <sup>2</sup> | 1909472   | <b>Purified protein</b>                     | -                                                                                          | -      | <b>Human urine:</b><br><i>No. of samples: 11</i><br><i>Gender: Male</i><br><i>Mean age: 37 years</i><br><i>Health status: Healthy</i>                                                 |
| Evidence that nephrocalcin and urine inhibit nucleation of calcium oxalate monohydrate crystals. <sup>3</sup>                                                | 1951713   | -                                           | -                                                                                          | -      | <b>Human urine:</b><br><i>No. of samples: 2</i><br><i>Gender: N/A</i><br><i>Mean age: N/A</i><br><i>Health status: 1 healthy and 1 stone former (recurrent calcium oxalate stone)</i> |
| Inhibitors within the nephron. <sup>4</sup>                                                                                                                  | 2008908   | -                                           | -                                                                                          | -      | <b>Human urine:</b><br><i>No. of samples: N/A</i><br><i>Gender: N/A</i><br><i>Mean age: N/A</i><br><i>Health status: Healthy and stone former</i>                                     |
| Does Tamm-Horsfall mucoprotein inhibit or promote calcium oxalate crystallization in human urine? <sup>5</sup>                                               | 2253402   | -                                           | -                                                                                          | -      | <b>Human urine:</b><br><i>No. of samples: 15</i><br><i>Gender: Male</i><br><i>Mean age: 30</i>                                                                                        |

|                                                                                                                                                 |         |                         |                                                         |   |                                                                                                                                                                                                                                                                                                                                                           |
|-------------------------------------------------------------------------------------------------------------------------------------------------|---------|-------------------------|---------------------------------------------------------|---|-----------------------------------------------------------------------------------------------------------------------------------------------------------------------------------------------------------------------------------------------------------------------------------------------------------------------------------------------------------|
|                                                                                                                                                 |         |                         |                                                         |   | <i>Health status: Healthy</i>                                                                                                                                                                                                                                                                                                                             |
| The dual role of polyelectrolytes and proteins as mineralization promoters and inhibitors of calcium oxalate monohydrate. <sup>6</sup>          | 2476205 | <b>Purified protein</b> | -                                                       | - | -                                                                                                                                                                                                                                                                                                                                                         |
| Possible role of Tamm-Horsfall glycoprotein in calcium oxalate crystallisation. <sup>7</sup>                                                    | 2611614 | -                       | -                                                       | - | <b>Human urine:</b><br><i>No. of samples: 11</i><br><i>Gender: Male</i><br><i>Mean age: N/A</i><br><i>Health status: Healthy</i>                                                                                                                                                                                                                          |
| Inhibition of calcium oxalate monohydrate crystal aggregation by urine proteins. <sup>8</sup>                                                   | 2750929 | <b>Purified protein</b> | -                                                       | - | <b>Human urine:</b><br><i>No. of samples: N/A</i><br><i>Gender: N/A</i><br><i>Mean age: N/A (adult)</i><br><i>Health status: Healthy and stone former with recurrent calcium oxalate stone</i><br><b>Calcium oxalate stone:</b><br><i>No. of samples: N/A</i><br><i>Gender: N/A</i><br><i>Mean age: N/A (adult)</i><br><i>Health status: Stone former</i> |
| Crystal adsorption and growth slowing by nephrocalcin, albumin, and Tamm-Horsfall protein. <sup>9</sup>                                         | 3202183 | <b>Purified protein</b> | <b>Cellular secretome:</b><br><i>Human kidney cells</i> | - | <b>Human urine:</b><br><i>No. of samples: N/A</i><br><i>Gender: N/A</i><br><i>Mean age: N/A (adult)</i><br><i>Health status: Healthy</i>                                                                                                                                                                                                                  |
| Tamm-Horsfall mucoproteins promote calcium oxalate crystal formation in urine: quantitative studies. <sup>10</sup>                              | 7057493 | -                       | -                                                       | - | <b>Human urine:</b><br><i>No. of samples: N/A</i><br><i>Gender: N/A</i><br><i>Mean age: N/A (adult)</i><br><i>Health status: Healthy</i>                                                                                                                                                                                                                  |
| Tamm and Horsfall glycoprotein does not promote spontaneous precipitation and crystal growth of calcium oxalate <i>in vitro</i> . <sup>11</sup> | 7086979 | -                       | -                                                       | - | <b>Human urine:</b><br><i>No. of samples: 15</i><br><i>Gender: N/A</i><br><i>Mean age: N/A</i><br><i>Health status: 6 healthy and 9</i>                                                                                                                                                                                                                   |

|                                                                                                                                                                                                                        |         |   |                                                                  |                                        |                                                                                                                                                                                              |
|------------------------------------------------------------------------------------------------------------------------------------------------------------------------------------------------------------------------|---------|---|------------------------------------------------------------------|----------------------------------------|----------------------------------------------------------------------------------------------------------------------------------------------------------------------------------------------|
|                                                                                                                                                                                                                        |         |   |                                                                  |                                        | stone formers with recurrent calcium stones                                                                                                                                                  |
| Characterization of uronic-acid-rich inhibitor of calcium oxalate crystallization isolated from rat urine. <sup>12</sup>                                                                                               | 7676539 | - | -                                                                | -                                      | <b>Human urine:</b><br><i>No. of samples:</i> N/A<br><i>Gender:</i> Male<br><i>Mean age:</i> N/A (adult)<br><i>Health status:</i> Healthy                                                    |
| Adhesion of calcium oxalate monohydrate crystals to renal epithelial cells is inhibited by specific anions. <sup>13</sup>                                                                                              | 7733317 | - | <b>Cellular secretome:</b><br><i>Human renal carcinoma cells</i> | -                                      | <b>Human urine:</b><br><i>No. of samples:</i> 2<br><i>Gender:</i> N/A<br><i>Mean age:</i> N/A<br><i>Health status:</i> Healthy                                                               |
| The role of Tamm-Horsfall mucoprotein in calcium oxalate crystallization. N-acetylcysteine--a new therapy for calcium oxalate urolithiasis. <sup>14</sup>                                                              | 7953256 | - | -                                                                | -                                      | <b>Human urine:</b><br><i>No. of samples:</i> 16<br><i>Gender:</i> N/A<br><i>Mean age:</i> N/A<br><i>Health status:</i> 10 healthy and 6 stone formers with recurrent calcium oxalate stones |
| Characterization of calcium-binding sites in the kidney stone inhibitor glycoprotein nephrocalcin with vanadyl ions: electron paramagnetic resonance and electron nuclear double resonance spectroscopy. <sup>15</sup> | 7972057 | - | -                                                                | <b>Animal kidney:</b><br><i>Bovine</i> | -                                                                                                                                                                                            |
| The effect of warfarin on urine calcium oxalate crystal growth inhibition and urinary excretion of calcium and nephrocalcin. <sup>16</sup>                                                                             | 8275352 | - | -                                                                | -                                      | <b>Human urine:</b><br><i>No. of samples:</i> N/A<br><i>Gender:</i> N/A<br><i>Mean age:</i> N/A<br><i>Health status:</i> Healthy                                                             |
| Regulation of renal epithelial cell endocytosis of calcium oxalate monohydrate crystals. <sup>17</sup>                                                                                                                 | 8498532 | - | <b>Cellular secretome:</b><br><i>Human kidney cells</i>          | -                                      | <b>Human urine:</b><br><i>No. of samples:</i> 2<br><i>Gender:</i> N/A<br><i>Mean age:</i> N/A (adult)<br><i>Health status:</i> Healthy                                                       |

|                                                                                                                                                                                                                                        |         |   |                                                                                                                                                          |                                 |                                                                                                                                                                                                      |
|----------------------------------------------------------------------------------------------------------------------------------------------------------------------------------------------------------------------------------------|---------|---|----------------------------------------------------------------------------------------------------------------------------------------------------------|---------------------------------|------------------------------------------------------------------------------------------------------------------------------------------------------------------------------------------------------|
| Effect of Tamm-Horsfall protein on calcium oxalate precipitation. <sup>18</sup>                                                                                                                                                        | 8608191 | - | -                                                                                                                                                        | -                               | <b>Human urine:</b><br>No. of samples: N/A<br>Gender: Male and female<br>Mean age: N/A (adult)<br>Health status: Healthy                                                                             |
| Identification of a macromolecular crystal growth inhibitor in human urine as osteopontin. <sup>19</sup>                                                                                                                               | 8839390 | - | -                                                                                                                                                        | -                               | <b>Human urine:</b><br>No. of samples: N/A<br>Gender: N/A<br>Mean age: N/A<br>Health status: N/A                                                                                                     |
| Characterization of Ca(2+)-binding sites in the kidney stone inhibitor glycoprotein nephrocalcin using vanadyl ions: different metal binding properties in strong and weak inhibitor proteins revealed by EPR and ENDOR. <sup>20</sup> | 8942630 | - | -                                                                                                                                                        | <b>Animal kidney:</b><br>Bovine | -                                                                                                                                                                                                    |
| Renal cell osteopontin production is stimulated by calcium oxalate monohydrate crystals. <sup>21</sup>                                                                                                                                 | 9067899 | - | <b>Cellular secretome:</b><br>- Nontransformed African green monkey (BSC-1) cells<br>- Madin-Darby canine kidney (MDCK) cells<br>- BALB/c3T3 fibroblasts | -                               | -                                                                                                                                                                                                    |
| Contribution of human uropontin to inhibition of calcium oxalate crystallization. <sup>22</sup>                                                                                                                                        | 9453018 | - | -                                                                                                                                                        | -                               | <b>Human urine:</b><br>No. of samples: 13<br>Gender: 8 males, 5 females<br>Mean age: Males = 41, females = 27<br>Health status: Healthy                                                              |
| Identification of structural domains in inter-alpha-trypsin involved in calcium oxalate crystallization. <sup>23</sup>                                                                                                                 | 9607205 | - | -                                                                                                                                                        | -                               | <b>Human urine:</b><br>No. of samples: N/A<br>Gender: N/A<br>Mean age: N/A<br>Health status: N/A<br><b>Human serum:</b><br>No. of samples: N/A<br>Gender: N/A<br>Mean age: N/A<br>Health status: N/A |

|                                                                                                                                                                                                                       |          |   |                                                                             |                                                                                      |                                                                                                                                                                                  |
|-----------------------------------------------------------------------------------------------------------------------------------------------------------------------------------------------------------------------|----------|---|-----------------------------------------------------------------------------|--------------------------------------------------------------------------------------|----------------------------------------------------------------------------------------------------------------------------------------------------------------------------------|
| Osteopontin antisense oligonucleotide inhibits adhesion of calcium oxalate crystals in Madin-Darby canine kidney cell. <sup>24</sup>                                                                                  | 9751404  | - | <b>Cellular secretome:</b><br><i>Madin-Darby canine kidney (MDCK) cells</i> | -                                                                                    | -                                                                                                                                                                                |
| Role of inter-alpha-inhibitor and its related proteins in urolithiasis. Purification of an inter-alpha-inhibitor related protein from the bovine kidney. <sup>25</sup>                                                | 10092154 | - | -                                                                           | <b>Animal kidney:</b><br><i>Bovine</i>                                               | -                                                                                                                                                                                |
| Nucleation of calcium oxalate crystals by albumin: involvement in the prevention of stone formation. <sup>26</sup>                                                                                                    | 10231440 | - | -                                                                           | -                                                                                    | <b>Human serum:</b><br><i>No. of samples: N/A</i><br><i>Gender: N/A</i><br><i>Mean age: N/A</i><br><i>Health status: N/A</i>                                                     |
| Inhibition of calcium oxalate crystal growth and aggregation by prothrombin and its <i>fragments in vitro</i> : relationship between protein structure and inhibitory activity. <sup>27</sup>                         | 10429186 | - | -                                                                           | -                                                                                    | <b>Human blood:</b><br><i>No. of samples: N/A</i><br><i>Gender: N/A</i><br><i>Mean age: N/A</i><br><i>Health status: N/A</i>                                                     |
| Role of urinary bikunin in the inhibition of calcium oxalate crystallization. <sup>28</sup>                                                                                                                           | 10541269 | - | -                                                                           | -                                                                                    | <b>Human urine:</b><br><i>No. of samples: N/A</i><br><i>Gender: N/A</i><br><i>Mean age: N/A</i><br><i>Health status: N/A</i>                                                     |
| Prothrombin gene expression in rat kidneys provides an opportunity to examine its role in urinary stone pathogenesis. <sup>29</sup>                                                                                   | 10541273 | - | -                                                                           | <b>Animal kidney:</b><br><i>Wistar rats</i>                                          | -                                                                                                                                                                                |
| Citrate determines calcium oxalate crystallization kinetics and crystal morphology-studies in the presence of Tamm-Horsfall protein of a healthy subject and a severely recurrent calcium stone former. <sup>30</sup> | 10692522 | - | -                                                                           | -                                                                                    | <b>Human urine:</b><br><i>No. of samples: 2</i><br><i>Gender: Male</i><br><i>Mean age: 41</i><br><i>Health status: 1 healthy and 1 stone former with recurrent calcium stone</i> |
| Fibronectin as a potent inhibitor of calcium oxalate urolithiasis. <sup>31</sup>                                                                                                                                      | 11025758 | - | <b>Cellular secretome:</b><br><i>Madin-Darby canine kidney (MDCK) cells</i> | <b>Animal kidney:</b><br><i>8-week-old, specific pathogen-free, male Wistar rats</i> | <b>Human urine:</b><br><i>No. of samples: 6</i><br><i>Gender: Male</i><br><i>Mean age: N/A (26-39 years)</i><br><i>Health status: Healthy</i>                                    |

|                                                                                                                                                                                                                               |          |                         |                                                                                |                                       |                                                                                                                                                                                                          |
|-------------------------------------------------------------------------------------------------------------------------------------------------------------------------------------------------------------------------------|----------|-------------------------|--------------------------------------------------------------------------------|---------------------------------------|----------------------------------------------------------------------------------------------------------------------------------------------------------------------------------------------------------|
| Expression of proteins that inhibit calcium oxalate crystallization <i>in vitro</i> in the urine of normal and stone-forming individuals. <sup>32</sup>                                                                       | 11136174 | -                       | -                                                                              | -                                     | <b>Human urine:</b><br>No. of samples: 85<br>Gender: 50 males, 35 females<br>Mean age: N/A<br>Health status: 24 healthy males, 19 healthy females, 26 male stone formers, 16 female stone formers        |
| Strong inhibition of crystal-cell attachment by pediatric urinary macromolecules: a close relationship with high urinary citrate secretion. <sup>33</sup>                                                                     | 11549512 | -                       | -                                                                              | -                                     | <b>Human urine:</b><br>No. of samples: 21<br>Gender: Male<br>Mean age: children = 6.1, adults = 31.5<br>Health status: Healthy                                                                           |
| Effect of prothrombin and its activation fragments on calcium oxalate crystal growth and aggregation in undiluted human urine <i>in vitro</i> : relationship between protein structure and inhibitory activity. <sup>34</sup> | 11914105 | -                       | -                                                                              | -                                     | <b>Human urine:</b><br>No. of samples: 10<br>Gender: Male<br>Mean age: N/A<br>Health status: Healthy<br><b>Human blood:</b><br>No. of samples: N/A<br>Gender: N/A<br>Mean age: N/A<br>Health status: N/A |
| Role of Tamm-Horsfall protein and uromodulin in calcium oxalate crystallization. <sup>35</sup>                                                                                                                                | 12424489 | -                       | -                                                                              | -                                     | <b>Human urine:</b><br>No. of samples: 30<br>Gender: 20 males, 10 females<br>Mean age: N/A<br>Health status: 10 healthy males, 5 healthy females and 5 pregnant females, 10 male stone formers           |
| The role of osteopontin on calcium oxalate crystal formation. <sup>36</sup>                                                                                                                                                   | 12706004 | <b>Purified protein</b> | <b>Cellular secretome:</b><br><i>Engelbreth-Holm-Swarm mouse sarcoma cells</i> | <b>Animal serum:</b><br><i>Bovine</i> | <b>Human urine:</b><br>No. of samples: N/A<br>Gender: N/A<br>Mean age: N/A<br>Health status: N/A<br><b>Human milk:</b><br>No. of samples: N/A<br>Gender: Female                                          |

|                                                                                                                                                |          |                         |                                                                                                         |                                      |                                                                                                                                                                                                                             |
|------------------------------------------------------------------------------------------------------------------------------------------------|----------|-------------------------|---------------------------------------------------------------------------------------------------------|--------------------------------------|-----------------------------------------------------------------------------------------------------------------------------------------------------------------------------------------------------------------------------|
|                                                                                                                                                |          |                         |                                                                                                         |                                      | Mean age: N/A<br>Health status: N/A                                                                                                                                                                                         |
| Renal tubular cell injury and fibronectin. <sup>37</sup>                                                                                       | 13680020 | <b>Purified protein</b> | -                                                                                                       | -                                    | -                                                                                                                                                                                                                           |
| Identification of Bikunin isolated from human urine inhibits calcium oxalate crystal growth and its localization in the kidneys. <sup>38</sup> | 14516400 | -                       | -                                                                                                       | -                                    | <b>Human urine:</b><br>No. of samples: 2<br>Gender: Male<br>Mean age: N/A<br>Health status: Healthy                                                                                                                         |
| Molecular modulation of calcium oxalate crystallization by osteopontin and citrate. <sup>39</sup>                                              | 14766970 | -                       | -                                                                                                       | -                                    | <b>Human urine:</b><br>No. of samples: N/A<br>Gender: N/A<br>Mean age: N/A<br>Health status: N/A                                                                                                                            |
| Renal epithelial cells constitutively produce a protein that blocks adhesion of crystals to their surface. <sup>40</sup>                       | 15100100 | -                       | <b>Cellular secretome:</b><br><i>Nontransformed African green monkey renal epithelial cells (BSC-1)</i> | -                                    | -                                                                                                                                                                                                                           |
| Effects of urinary prothrombin fragment 1 in the formation of calcium oxalate calculus. <sup>41</sup>                                          | 15592049 | -                       | -                                                                                                       | -                                    | <b>Human urine:</b><br>No. of samples: 20<br>Gender: Male<br>Mean age: N/A (healthy = 28-43 years, stone former = 24-40 years)<br>Health status: 8 healthy, 12 calcium oxalate stone formers                                |
| Regulation by macromolecules of calcium oxalate crystal aggregation in stone formers. <sup>42</sup>                                            | 15864572 | <b>Purified protein</b> | <b>Cellular secretome:</b><br><i>Mouse kidney cells</i>                                                 | <b>Animal milk:</b><br><i>Bovine</i> | <b>Human urine:</b><br>No. of samples: 52<br>Gender: 38 males, 14 females<br>Mean age: Healthy = 46, stone former = 51<br>Health status: 20 healthy males, 5 healthy females, 18 male stone formers, 9 female stone formers |

|                                                                                                                                                                                   |          |                                   |   |                                                                      |                                                                                                                                                                                                                                                                                                                                                             |
|-----------------------------------------------------------------------------------------------------------------------------------------------------------------------------------|----------|-----------------------------------|---|----------------------------------------------------------------------|-------------------------------------------------------------------------------------------------------------------------------------------------------------------------------------------------------------------------------------------------------------------------------------------------------------------------------------------------------------|
| Urinary macromolecular inhibition of crystal adhesion to renal epithelial cells is impaired in male stone formers. <sup>43</sup>                                                  | 16164655 | -                                 | - | -                                                                    | <b>Human urine:</b><br><i>No. of samples:</i> 48<br><i>Gender:</i> 34 males, 14 females<br><i>Mean age:</i> Males = 56.7, females = 54.0<br><i>Health status:</i> 17 healthy males, 7 healthy females, 17 male stone formers, 7 female stone formers                                                                                                        |
| Identification of human urinary trefoil factor 1 as a novel calcium oxalate crystal growth inhibitor. <sup>44</sup>                                                               | 16308573 | -                                 | - | -                                                                    | <b>Human urine:</b><br><i>No. of samples:</i> 53<br><i>Gender:</i> 26 males, 27 females<br><i>Mean age:</i> Healthy = 26.1, stone former = 45.3<br><i>Health status:</i> 14 healthy males and 16 healthy females, 12 male stone formers, 11 female stone formers (18 new-onset calcium oxalate stone formers and 5 recurrent calcium oxalate stone formers) |
| How does bovine serum albumin prevent the formation of kidney stone? A kinetics study. <sup>45</sup>                                                                              | 16671718 | <b>Purified protein</b>           | - | -                                                                    | -                                                                                                                                                                                                                                                                                                                                                           |
| Tamm-Horsfall protein in recurrent calcium kidney stone formers with positive family history: abnormalities in urinary excretion, molecular structure and function. <sup>46</sup> | 17345077 | -                                 | - | -                                                                    | <b>Human urine:</b><br><i>No. of samples:</i> 78<br><i>Gender:</i> N/A<br><i>Mean age:</i> N/A<br><i>Health status:</i> 34 healthy, 44 recurrent calcium stone formers                                                                                                                                                                                      |
| Renal calcinosis and stone formation in mice lacking osteopontin, Tamm-Horsfall protein, or both. <sup>47</sup>                                                                   | 17898038 | -                                 | - | <b>Animal urine:</b><br><i>OPN-null mice</i><br><i>THP-null mice</i> | -                                                                                                                                                                                                                                                                                                                                                           |
| Control of calcium oxalate crystal growth by face-specific adsorption of an osteopontin phosphopeptide. <sup>48</sup>                                                             | 17994739 | <b>Synthesized phosphopeptide</b> | - | -                                                                    | -                                                                                                                                                                                                                                                                                                                                                           |



|                                                                                                                                                                                                              |          |                                   |   |                                                          |                                                                                                                                                                                                                            |
|--------------------------------------------------------------------------------------------------------------------------------------------------------------------------------------------------------------|----------|-----------------------------------|---|----------------------------------------------------------|----------------------------------------------------------------------------------------------------------------------------------------------------------------------------------------------------------------------------|
| Urinary trefoil factor 1 is a novel potent inhibitor of calcium oxalate crystal growth and aggregation. <sup>49</sup>                                                                                        | 18295252 | -                                 | - | -                                                        | <b>Human urine:</b><br>No. of samples: 5<br>Gender: N/A<br>Mean age: N/A<br>Health status: Healthy                                                                                                                         |
| Phosphorylation of osteopontin is required for inhibition of calcium oxalate crystallization. <sup>50</sup>                                                                                                  | 18611047 | <b>Synthesized phosphopeptide</b> | - | -                                                        | -                                                                                                                                                                                                                          |
| Phosphorylation of osteopontin peptides mediates adsorption to and incorporation into calcium oxalate crystals. <sup>51</sup>                                                                                | 18728346 | <b>Synthesized phosphopeptide</b> | - | -                                                        | -                                                                                                                                                                                                                          |
| Kinetics of calcium oxalate crystal growth in the presence of osteopontin isoforms: an analysis by scanning confocal interference microscopy. <sup>52</sup>                                                  | 19189038 | <b>Purified protein</b>           | - | <b>Animal bone:</b><br>Rat<br><b>Animal milk:</b><br>Cow | -                                                                                                                                                                                                                          |
| Modulation of calcium oxalate dihydrate growth by selective crystal-face binding of phosphorylated osteopontin and polyaspartate peptide showing occlusion by sectoral (compositional) zoning. <sup>53</sup> | 19581305 | -                                 | - | -                                                        | <b>Human urine:</b><br>No. of samples: 6<br>Gender: Male<br>Mean age: N/A (23-45 years)<br>Health status: Healthy<br><b>Stone:</b><br>No. of samples: 2<br>Gender: Female<br>Mean age: 67.5<br>Health status: Stone former |
| The effect of intracrystalline and surface-bound osteopontin on the attachment of calcium oxalate dihydrate crystals to Madin-Darby canine kidney (MDCK) cells in ultrafiltered human urine. <sup>54</sup>   | 21883862 | -                                 | - | -                                                        | <b>Human urine:</b><br>No. of samples: 5<br>Gender: 2 males, 3 females<br>Mean age: N/A<br>Health status: Healthy<br><b>Human milk:</b><br>No. of samples: N/A<br>Gender: Female<br>Mean age: N/A<br>Health status: N/A    |
| On the catalysis of calcium oxalate dihydrate formation by osteopontin peptides. <sup>55</sup>                                                                                                               | 22503630 | <b>Synthesized phosphopeptide</b> | - | -                                                        | -                                                                                                                                                                                                                          |

|                                                                                                                                                                                                                             |          |                                   |                                                            |   |                                                                                                                                                   |
|-----------------------------------------------------------------------------------------------------------------------------------------------------------------------------------------------------------------------------|----------|-----------------------------------|------------------------------------------------------------|---|---------------------------------------------------------------------------------------------------------------------------------------------------|
| Novel antilithiatic cationic proteins from human calcium oxalate renal stone matrix identified by MALDI-TOF-MS endowed with cytoprotective potential: an insight into the molecular mechanism of urolithiasis <sup>56</sup> | 23123287 | -                                 | -                                                          | - | <b>Human stone:</b><br><i>No. of samples:</i> N/A<br><i>Gender:</i> N/A<br><i>Mean age:</i> N/A (>25 years)<br><i>Health status:</i> Stone former |
| Reversible inhibition of calcium oxalate monohydrate growth by an osteopontin phosphopeptide. <sup>57</sup>                                                                                                                 | 23611580 | <b>Synthesized phosphopeptide</b> | -                                                          | - | -                                                                                                                                                 |
| Peptides of Matrix Gla protein inhibit nucleation and growth of hydroxyapatite and calcium oxalate monohydrate crystals. <sup>58</sup>                                                                                      | 24265810 | <b>Synthesized phosphopeptide</b> | -                                                          | - | -                                                                                                                                                 |
| Natural promoters of calcium oxalate monohydrate crystallization. <sup>59</sup>                                                                                                                                             | 25119124 | <b>Purified protein</b>           | -                                                          | - | -                                                                                                                                                 |
| The Long Pentraxin PTX3 Is an Endogenous Inhibitor of Hyperoxaluria-Related Nephrocalcinosis and Chronic Kidney Disease. <sup>60</sup>                                                                                      | 30319631 | -                                 | <b>Cellular secretome:</b><br><i>PerC6 human cell line</i> | - | -                                                                                                                                                 |
| SIRT3 inhibited the formation of calcium oxalate-induced kidney stones through regulating NRF2/HO-1 signaling pathway. <sup>61</sup>                                                                                        | 30548662 | -                                 | <b>Intracellular protein:</b><br><i>HK-2 cells</i>         | - | -                                                                                                                                                 |
| Modulatory effects of fibronectin on calcium oxalate crystallization, growth, aggregation, adhesion on renal tubular cells, and invasion through extracellular matrix. <sup>62</sup>                                        | 30701361 | <b>Purified protein</b>           |                                                            | - | -                                                                                                                                                 |

N/A = not available or not reported.

## REFERENCES

- 1 Worcester, E. M., Blumenthal, S. S., Beshensky, A. M. & Lewand, D. L. The calcium oxalate crystal growth inhibitor protein produced by mouse kidney cortical cells in culture is osteopontin. *J Bone Miner Res* **7**, 1029-1036, doi:10.1002/jbmr.5650070905 (1992).
- 2 Ryall, R. L., Harnett, R. M., Hibberd, C. M., Edyvane, K. A. & Marshall, V. R. Effects of chondroitin sulphate, human serum albumin and Tamm-Horsfall mucoprotein on calcium oxalate crystallization in undiluted human urine. *Urol Res* **19**, 181-188, doi:10.1007/BF00303747 (1991).
- 3 Asplin, J., DeGanello, S., Nakagawa, Y. N. & Coe, F. L. Evidence that nephrocalcin and urine inhibit nucleation of calcium oxalate monohydrate crystals. *Am J Physiol* **261**, F824-830, doi:10.1152/ajprenal.1991.261.5.F824 (1991).
- 4 Coe, F. L., Nakagawa, Y. & Parks, J. H. Inhibitors within the nephron. *Am. J Kidney Dis* **17**, 407-413 (1991).
- 5 Grover, P. K., Ryall, R. L. & Marshall, V. R. Does Tamm-Horsfall mucoprotein inhibit or promote calcium oxalate crystallization in human urine? *Clin. Chim. Acta* **190**, 223-238 (1990).
- 6 Campbell, A. A., Ebrahimpour, A., Perez, L., Smesko, S. A. & Nancollas, G. H. The dual role of polyelectrolytes and proteins as mineralization promoters and inhibitors of calcium oxalate monohydrate. *Calcif Tissue Int* **45**, 122-128, doi:10.1007/BF02561411 (1989).
- 7 Yoshioka, T. *et al.* Possible role of Tamm-Horsfall glycoprotein in calcium oxalate crystallisation. *Br J Urol* **64**, 463-467, doi:10.1111/j.1464-410x.1989.tb05277.x (1989).
- 8 Hess, B., Nakagawa, Y. & Coe, F. L. Inhibition of calcium oxalate monohydrate crystal aggregation by urine proteins. *Am. J Physiol* **257**, F99-106 (1989).
- 9 Worcester, E. M., Nakagawa, Y., Wabner, C. L., Kumar, S. & Coe, F. L. Crystal adsorption and growth slowing by nephrocalcin, albumin, and Tamm-Horsfall protein. *Am. J Physiol* **255**, F1197-F1205 (1988).
- 10 Rose, G. A. & Sulaiman, S. Tamm-Horsfall mucoproteins promote calcium oxalate crystal formation in urine: quantitative studies. *J Urol* **127**, 177-179, doi:10.1016/s0022-5347(17)53656-3 (1982).
- 11 Kitamura, T. & Pak, C. Y. Tamm and Horsfall glycoprotein does not promote spontaneous precipitation and crystal growth of calcium oxalate in vitro. *J Urol* **127**, 1024-1026, doi:10.1016/s0022-5347(17)54180-4 (1982).
- 12 Atmani, F. & Khan, S. R. Characterization of uronic-acid-rich inhibitor of calcium oxalate crystallization isolated from rat urine. *Urol Res* **23**, 95-101, doi:10.1007/BF00307939 (1995).

- 13 Lieske, J. C., Leonard, R. & Toback, F. G. Adhesion of calcium oxalate monohydrate crystals to renal epithelial cells is inhibited by specific anions. *Am. J Physiol* **268**, F604-F612 (1995).
- 14 Fan, J. & Shen, S. J. The role of Tamm-Horsfall mucoprotein in calcium oxalate crystallization. N-acetylcysteine--a new therapy for calcium oxalate urolithiasis. *Br J Urol* **74**, 288-293, doi:10.1111/j.1464-410x.1994.tb16612.x (1994).
- 15 Mustafi, D. & Nakagawa, Y. Characterization of calcium-binding sites in the kidney stone inhibitor glycoprotein nephrocalcin with vanadyl ions: electron paramagnetic resonance and electron nuclear double resonance spectroscopy. *Proc Natl Acad Sci U S A* **91**, 11323-11327, doi:10.1073/pnas.91.24.11323 (1994).
- 16 Worcester, E. M., Sebastian, J. L., Hiatt, J. G., Beshensky, A. M. & Sadowski, J. A. The effect of warfarin on urine calcium oxalate crystal growth inhibition and urinary excretion of calcium and nephrocalcin. *Calcif Tissue Int* **53**, 242-248, doi:10.1007/BF01320909 (1993).
- 17 Lieske, J. C. & Toback, F. G. Regulation of renal epithelial cell endocytosis of calcium oxalate monohydrate crystals. *Am. J Physiol* **264**, F800-F807 (1993).
- 18 Benkovic, J., Furedi-Milhofer, H., Hlady, V., Cvoriscec, D. & Stavljenic-Rukavina, A. Effect of Tamm-Horsfall protein on calcium oxalate precipitation. *Eur. J Clin. Chem. Clin. Biochem* **33**, 705-710 (1995).
- 19 Sorensen, S., Justesen, S. J. & Johnsen, A. H. Identification of a macromolecular crystal growth inhibitor in human urine as osteopontin. *Urol. Res* **23**, 327-334 (1995).
- 20 Mustafi, D. & Nakagawa, Y. Characterization of Ca(2+)-binding sites in the kidney stone inhibitor glycoprotein nephrocalcin using vanadyl ions: different metal binding properties in strong and weak inhibitor proteins revealed by EPR and ENDOR. *Biochemistry* **35**, 14703-14709, doi:10.1021/bi961200j (1996).
- 21 Lieske, J. C., Hammes, M. S., Hoyer, J. R. & Toback, F. G. Renal cell osteopontin production is stimulated by calcium oxalate monohydrate crystals. *Kidney Int* **51**, 679-686, doi:10.1038/ki.1997.98 (1997).
- 22 Asplin, J. R., Arsenault, D., Parks, J. H., Coe, F. L. & Hoyer, J. R. Contribution of human uropontin to inhibition of calcium oxalate crystallization. *Kidney Int* **53**, 194-199, doi:10.1046/j.1523-1755.1998.00739.x (1998).
- 23 Kobayashi, H., Shibata, K., Fujie, M., Sugino, D. & Terao, T. Identification of structural domains in inter-alpha-trypsin involved in calcium oxalate crystallization. *Kidney Int* **53**, 1727-1735 (1998).
- 24 Yamate, T., Kohri, K., Umekawa, T., Iguchi, M. & Kurita, T. Osteopontin antisense oligonucleotide inhibits adhesion of calcium oxalate crystals in Madin-Darby canine kidney cell. *J Urol* **160**, 1506-1512 (1998).
- 25 Atmani, F. & Khan, S. R. Role of inter-alpha-inhibitor and its related proteins in urolithiasis. Purification of an inter-alpha-inhibitor related protein from the bovine kidney. *Urol. Res* **27**, 57-61 (1999).

- 26 Cerini, C. *et al.* Nucleation of calcium oxalate crystals by albumin: involvement in the prevention of stone formation. *Kidney Int* **55**, 1776-1786, doi:10.1046/j.1523-1755.1999.00426.x (1999).
- 27 Grover, P. K. & Ryall, R. L. Inhibition of calcium oxalate crystal growth and aggregation by prothrombin and its fragments in vitro: relationship between protein structure and inhibitory activity. *Eur. J Biochem* **263**, 50-56 (1999).
- 28 Atmani, F. & Khan, S. R. Role of urinary bikunin in the inhibition of calcium oxalate crystallization. *J Am. Soc. Nephrol* **10 Suppl 14**, S385-S388 (1999).
- 29 Grover, P. K., Stapleton, A. M. & Ryall, R. L. Prothrombin gene expression in rat kidneys provides an opportunity to examine its role in urinary stone pathogenesis. *J Am Soc Nephrol* **10 Suppl 14**, S404-407 (1999).
- 30 Hess, B., Jordi, S., Zipperle, L., Ettinger, E. & Giovanoli, R. Citrate determines calcium oxalate crystallization kinetics and crystal morphology-studies in the presence of Tamm-Horsfall protein of a healthy subject and a severely recurrent calcium stone former. *Nephrol. Dial. Transplant* **15**, 366-374 (2000).
- 31 Tsujihata, M. *et al.* Fibronectin as a potent inhibitor of calcium oxalate urolithiasis. *J Urol* **164**, 1718-1723 (2000).
- 32 Hedgepeth, R. C., Yang, L., Resnick, M. I. & Marengo, S. R. Expression of proteins that inhibit calcium oxalate crystallization in vitro in the urine of normal and stone-forming individuals. *Am. J Kidney Dis* **37**, 104-112 (2001).
- 33 Miyake, O. *et al.* Strong inhibition of crystal-cell attachment by pediatric urinary macromolecules: a close relationship with high urinary citrate secretion. *Urology* **58**, 493-497, doi:10.1016/s0090-4295(01)01257-2 (2001).
- 34 Grover, P. K. & Ryall, R. L. Effect of prothrombin and its activation fragments on calcium oxalate crystal growth and aggregation in undiluted human urine in vitro: relationship between protein structure and inhibitory activity. *Clin Sci (Lond)* **102**, 425-434 (2002).
- 35 Carvalho, M., Mulinari, R. A. & Nakagawa, Y. Role of Tamm-Horsfall protein and uromodulin in calcium oxalate crystallization. *Braz J Med Biol Res* **35**, 1165-1172, doi:10.1590/s0100-879x2002001000009 (2002).
- 36 Konya, E., Umekawa, T., Iguchi, M. & Kurita, T. The role of osteopontin on calcium oxalate crystal formation. *Eur Urol* **43**, 564-571, doi:10.1016/s0302-2838(03)00088-5 (2003).
- 37 Tsujihata, M. *et al.* Renal tubular cell injury and fibronectin. *Urol. Res* **31**, 368-373 (2003).
- 38 Okuyama, M., Yamaguchi, S. & Yachiku, S. Identification of bikunin isolated from human urine inhibits calcium oxalate crystal growth and its localization in the kidneys. *Int J Urol* **10**, 530-535, doi:10.1046/j.1442-2042.2003.00677.x (2003).

- 39 Qiu, S. R. *et al.* Molecular modulation of calcium oxalate crystallization by osteopontin and citrate. *Proc Natl Acad Sci U S A* **101**, 1811-1815, doi:10.1073/pnas.0307900100 (2004).
- 40 Kumar, V., Yu, S., Farell, G., Toback, F. G. & Lieske, J. C. Renal epithelial cells constitutively produce a protein that blocks adhesion of crystals to their surface. *Am. J Physiol Renal Physiol* **287**, F373-F383 (2004).
- 41 Liu, J., Chen, J., Wang, T., Wang, S. & Ye, Z. Effects of urinary prothrombin fragment 1 in the formation of calcium oxalate calculus. *J Urol* **173**, 113-116, doi:10.1097/01.ju.0000146847.24571.c8 (2005).
- 42 Wesson, J. A., Ganne, V., Beshensky, A. M. & Kleinman, J. G. Regulation by macromolecules of calcium oxalate crystal aggregation in stone formers. *Urol. Res* **33**, 206-212 (2005).
- 43 Kumar, V., Pena de la Vega, L., Farell, G. & Lieske, J. C. Urinary macromolecular inhibition of crystal adhesion to renal epithelial cells is impaired in male stone formers. *Kidney Int* **68**, 1784-1792, doi:10.1111/j.1523-1755.2005.00595.x (2005).
- 44 Chutipongtanate, S. *et al.* Identification of human urinary trefoil factor 1 as a novel calcium oxalate crystal growth inhibitor. *J Clin. Invest* **115**, 3613-3622 (2005).
- 45 Liu, J., Jiang, H. & Liu, X. Y. How does bovine serum albumin prevent the formation of kidney stone? A kinetics study. *J Phys Chem B* **110**, 9085-9089, doi:10.1021/jp057403b (2006).
- 46 Jaggi, M., Nakagawa, Y., Zipperle, L. & Hess, B. Tamm-Horsfall protein in recurrent calcium kidney stone formers with positive family history: abnormalities in urinary excretion, molecular structure and function. *Urol Res* **35**, 55-62, doi:10.1007/s00240-007-0083-7 (2007).
- 47 Mo, L. *et al.* Renal calcinosis and stone formation in mice lacking osteopontin, Tamm-Horsfall protein, or both. *Am. J Physiol Renal Physiol* **293**, F1935-F1943 (2007).
- 48 Grohe, B. *et al.* Control of calcium oxalate crystal growth by face-specific adsorption of an osteopontin phosphopeptide. *J Am Chem Soc* **129**, 14946-14951, doi:10.1021/ja0745613 (2007).
- 49 Thongboonkerd, V., Chutipongtanate, S., Semangoen, T. & Malasit, P. Urinary trefoil factor 1 is a novel potent inhibitor of calcium oxalate crystal growth and aggregation. *J Urol* **179**, 1615-1619 (2008).
- 50 Wang, L. *et al.* Phosphorylation of osteopontin is required for inhibition of calcium oxalate crystallization. *J Phys. Chem. B* **112**, 9151-9157 (2008).
- 51 O'Young, J. *et al.* Phosphorylation of osteopontin peptides mediates adsorption to and incorporation into calcium oxalate crystals. *Cells Tissues Organs* **189**, 51-55, doi:10.1159/000151724 (2009).

- 52 Langdon, A. *et al.* Kinetics of calcium oxalate crystal growth in the presence of osteopontin isoforms: an analysis by scanning confocal interference microscopy. *Calcif Tissue Int* **84**, 240-248, doi:10.1007/s00223-008-9215-5 (2009).
- 53 Chien, Y. C. *et al.* Modulation of calcium oxalate dihydrate growth by selective crystal-face binding of phosphorylated osteopontin and polyaspartate peptide showing occlusion by sectoral (compositional) zoning. *J Biol Chem* **284**, 23491-23501, doi:10.1074/jbc.M109.021899 (2009).
- 54 Thurgood, L. A., Sorensen, E. S. & Ryall, R. L. The effect of intracrystalline and surface-bound osteopontin on the attachment of calcium oxalate dihydrate crystals to Madin-Darby canine kidney (MDCK) cells in ultrafiltered human urine. *BJU Int* **109**, 1100-1109, doi:10.1111/j.1464-410X.2011.10530.x (2012).
- 55 Chan, B. P. *et al.* On the catalysis of calcium oxalate dihydrate formation by osteopontin peptides. *Colloids Surf B Biointerfaces* **96**, 22-28, doi:10.1016/j.colsurfb.2012.03.015 (2012).
- 56 Aggarwal, K. P., Tandon, S., Naik, P. K., Singh, S. K. & Tandon, C. Novel antilithiatic cationic proteins from human calcium oxalate renal stone matrix identified by MALDI-TOF-MS endowed with cytoprotective potential: an insight into the molecular mechanism of urolithiasis. *Clin Chim Acta* **415**, 181-190, doi:10.1016/j.cca.2012.10.040 (2013).
- 57 Nene, S. S., Hunter, G. K., Goldberg, H. A. & Hutter, J. L. Reversible inhibition of calcium oxalate monohydrate growth by an osteopontin phosphopeptide. *Langmuir* **29**, 6287-6295, doi:10.1021/la400891b (2013).
- 58 Goiko, M. *et al.* Peptides of Matrix Gla protein inhibit nucleation and growth of hydroxyapatite and calcium oxalate monohydrate crystals. *PLoS One* **8**, e80344, doi:10.1371/journal.pone.0080344 (2013).
- 59 Farmanesh, S. *et al.* Natural promoters of calcium oxalate monohydrate crystallization. *J Am. Chem. Soc* **136**, 12648-12657 (2014).
- 60 Marschner, J. A. *et al.* The Long Pentraxin PTX3 Is an Endogenous Inhibitor of Hyperoxaluria-Related Nephrocalcinosis and Chronic Kidney Disease. *Front Immunol* **9**, 2173, doi:10.3389/fimmu.2018.02173 (2018).
- 61 Xi, J. *et al.* SIRT3 inhibited the formation of calcium oxalate-induced kidney stones through regulating NRF2/HO-1 signaling pathway. *J Cell Biochem*, doi:10.1002/jcb.28109 (2018).
- 62 Khamchun, S., Sueksakit, K., Chaiyarit, S. & Thongboonkerd, V. Modulatory effects of fibronectin on calcium oxalate crystallization, growth, aggregation, adhesion on renal tubular cells, and invasion through extracellular matrix. *J Biol. Inorg. Chem* **24**, 235-246 (2019).
